# Supplementary material
Source: PubMed Central journal article supplement (PMC9395244)

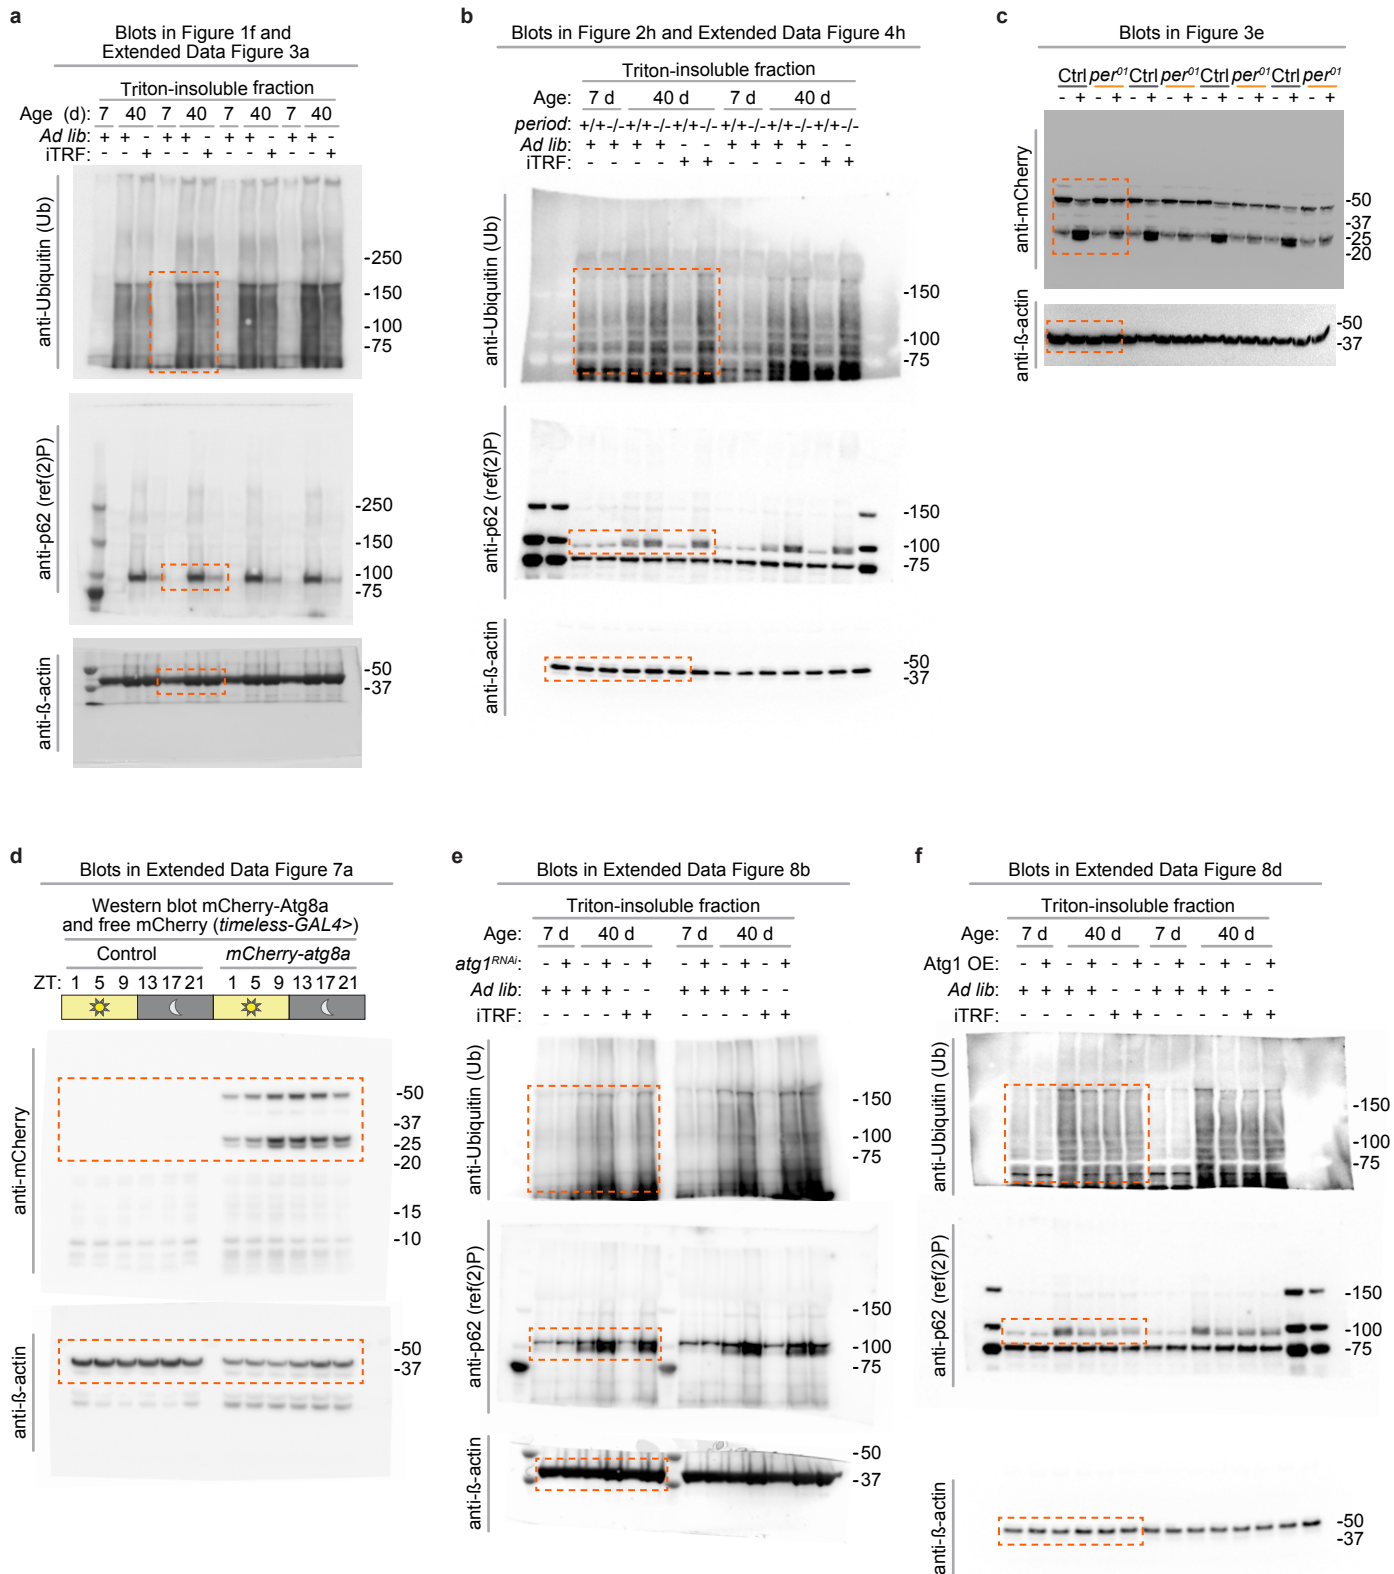

Supplement: NIHMS1819528-supplement-SI_Fig_1.pdf [file NIHMS1819528-supplement-SI_Fig_1.pdf]
